# Supplementary material for: Discovery of immunodominant T-cell epitopes reveals penton protein as a second immunodominant target in human adenovirus infection
Source: Springer Nature journal article supplement (doi:10.1186/s12967-016-1042-2), 2016-10-07
Supplement: MOESM1 [file 10832052]

**Figure S1. Validation of peptide-binding affinity and concentration.**

**A**

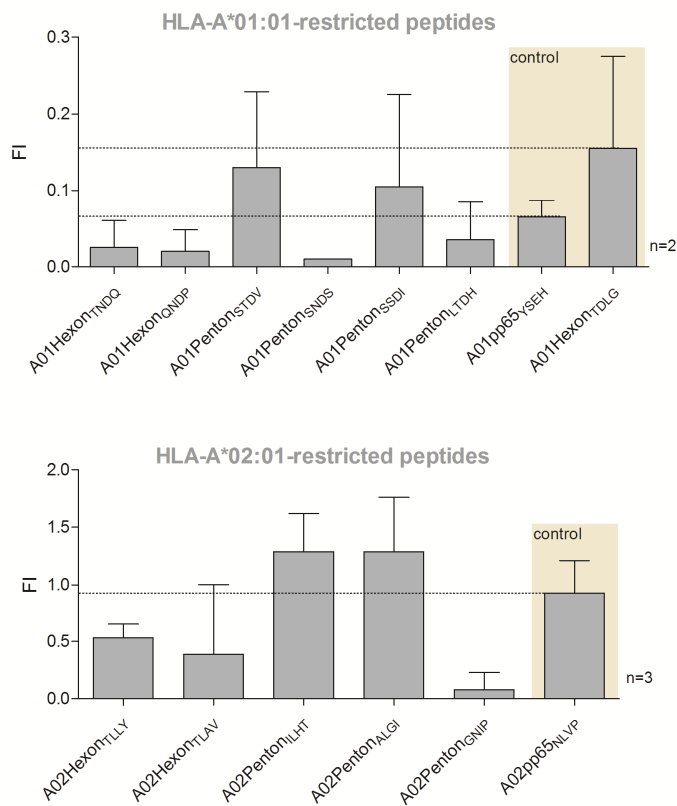

**B**

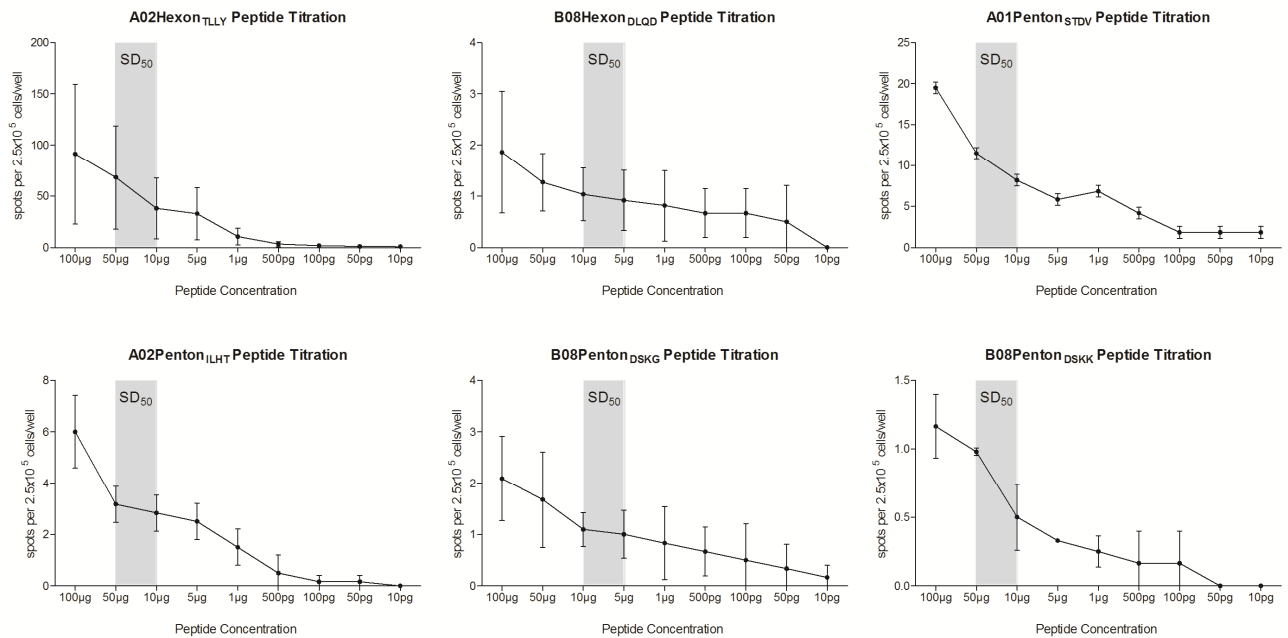

(A) The HLA binding affinity of the HAdV peptide candidates (nonamers, n=11) was analyzed by flow cytometry. Non-transduced (HLA-A\*02<sup>+</sup>) and HLA-A\*01-transduced T2

cells were pulsed with the respective candidate peptide (50  $\mu\text{g/ml}$ ) plus human  $\beta$ 2-microglobulin (5  $\mu\text{g/ml}$ ). T2 cells incubated without peptide served as controls. The immunogenic HLA-A\*01- and A\*02-restricted peptides (A01pp65<sub>YSEH</sub> and A02pp65<sub>NLVP</sub>) from human cytomegalovirus (CMV) phosphoprotein 65 (pp65) as well as the immunogenic HLA-A\*01-restricted hexon-derived peptide (A01Hexon<sub>TDLG</sub>) served as positive controls. HLA-A\*01 and HLA-A\*02 expression levels on T2 cells were analyzed after 15-18 hours of incubation. The fluorescence index (FI) was calculated as the mean fluorescence intensity (MFI) of HLA-A\*01:01 and HLA-A\*02:01 on non-transduced and A01-transduced T2 cells, respectively. The results are expressed as the mean of n=2 (HLA-A\*01) and n=3 (HLA-A\*02) independent experiments  $\pm$  standard deviation (SD). **(B)** For the definition of optimal T-cell stimulation conditions, concentration-dependent production of IFN- $\gamma$  in response to the six identified immunodominant HAdV peptides (A02Hexon<sub>TLLY</sub>, B08Hexon<sub>DLQD</sub>, B08Penton<sub>DSKG</sub>, A01Penton<sub>STDV</sub>, A02Penton<sub>ILHT</sub>, and B08Penton<sub>DSKK</sub>) was determined in peripheral blood mononuclear cells (PBMCs) from healthy donors by IFN- $\gamma$  EliSpot as described previously [1, 2].  $2.5 \times 10^5$  PBMCs were plated in triplicate wells and incubated overnight with peptides titrated at final concentrations of 100  $\mu\text{g/ml}$  to 10  $\text{pg/ml}$ . PBMCs cultured in medium with or without 1  $\mu\text{g/ml}$  staphylococcal enterotoxin B (SEB) served as positive and negative controls, respectively. IFN- $\gamma$  EliSpot results are expressed as the number of IFN- $\gamma$  spots per  $2.5 \times 10^5$  cells/well (spw). Referring to the peptide concentration, the functional avidity of HAdV-specific CTLs was measured as the concentration of peptide required to elicit a half-maximal response (sensitizing dose,  $SD_{50}$ ). The results of n=2 (B08Hexon<sub>DLQD</sub>, B08Penton<sub>DSKG</sub>, A01Penton<sub>STDV</sub>, A02Penton<sub>ILHT</sub>, and B08Penton<sub>DSKK</sub>) and n=3 (A02Hexon<sub>TLLY</sub>) independent experiments are expressed as the mean frequency of IFN- $\gamma^+$  T cells  $\pm$  SD.

## References

1. Sukdolak C, Tischer S, Dieks D, Figueiredo C, Goudeva L, Heuft HG, Verboom M, Immenschuh S, Heim A, Borchers S, et al: **CMV-, EBV- and ADV-specific T cell immunity: screening and monitoring of potential third-party donors to improve post-transplantation outcome.** *Biol Blood Marrow Transplant* 2013, **19**:1480-1492.
2. Tischer S, Dieks D, Sukdolak C, Bunse C, Figueiredo C, Immenschuh S, Borchers S, Stripecke R, Maecker-Kolhoff B, Blasczyk R, Eiz-Vesper B: **Evaluation of suitable target antigens and immunoassays for high-accuracy immune monitoring of cytomegalovirus and Epstein-Barr virus-specific T cells as targets of interest in immunotherapeutic approaches.** *J Immunol Methods* 2014, **408**:101-113.
