# Supplementary material for: Discovery of immunodominant T-cell epitopes reveals penton protein as a second immunodominant target in human adenovirus infection
Source: Springer Nature journal article supplement (doi:10.1186/s12967-016-1042-2), 2016-10-07
Supplement: MOESM2 [file 10832052]

**Figure S2. Analysis of HAdV-specific T-cell responses against the novel immunodominant T-cell epitope in healthy donors.**

**A**

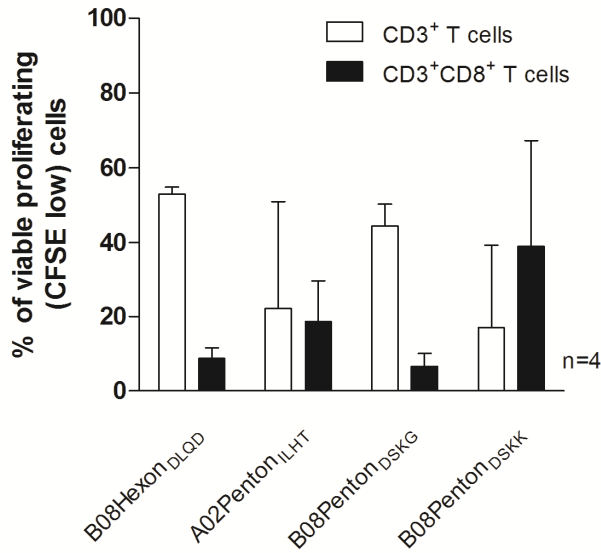

**B**

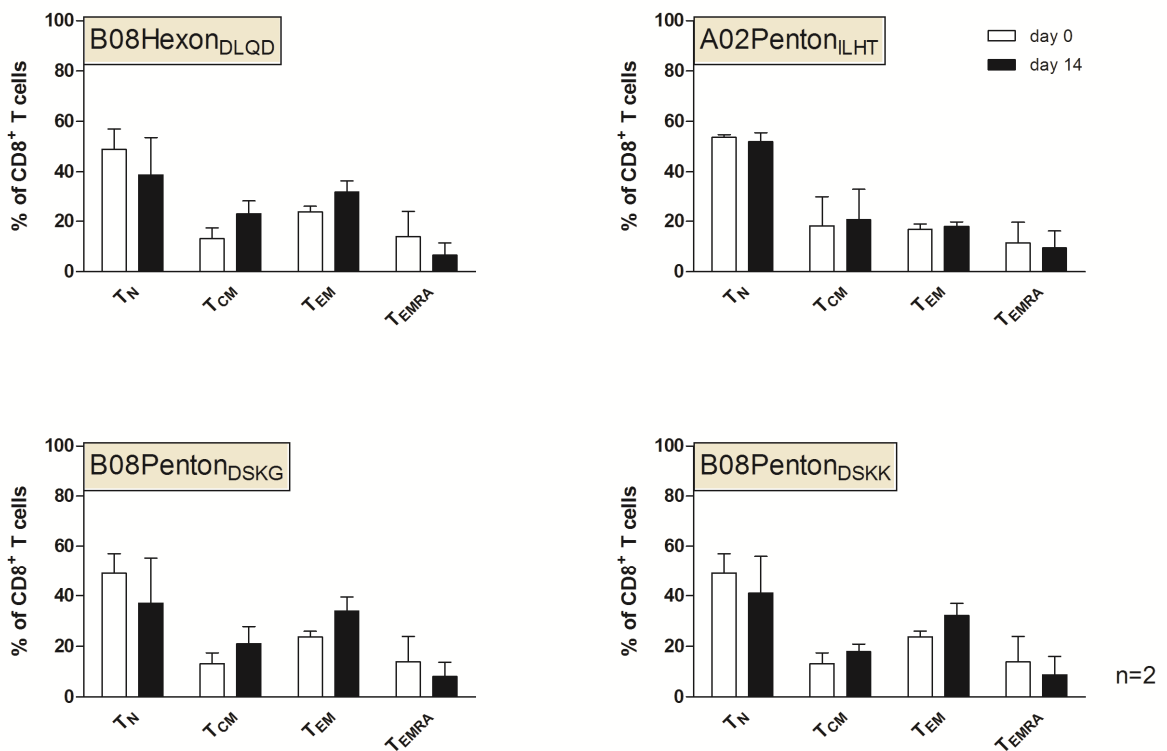

**C**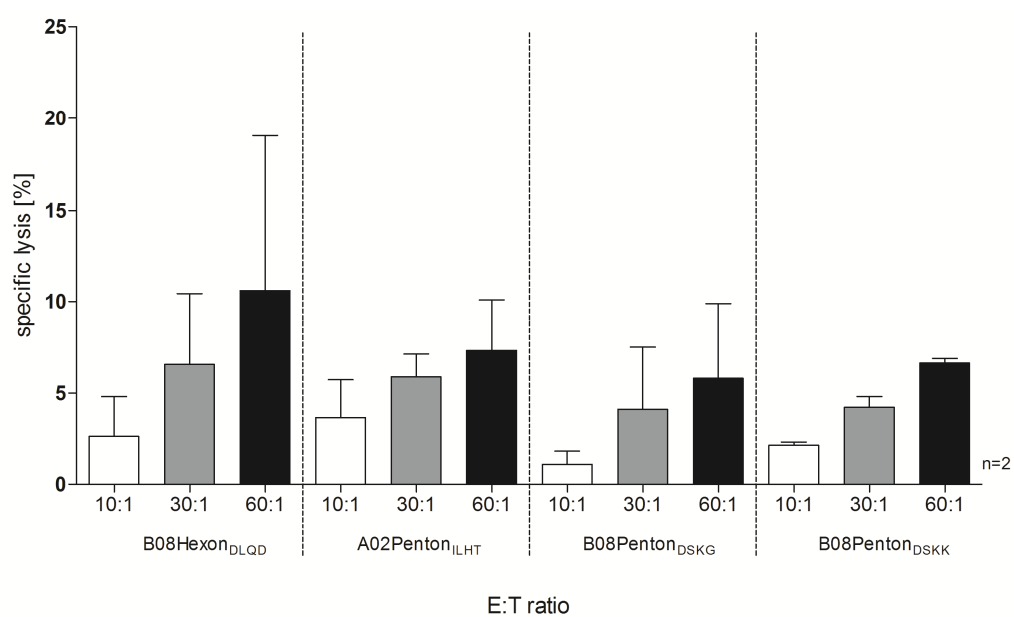**D**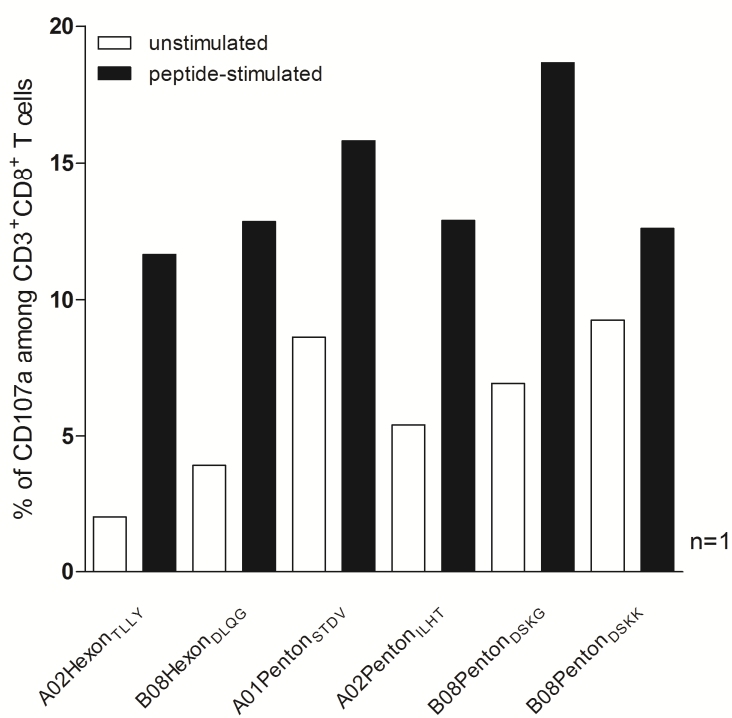

HAdV-specific T cells induced by the peptide epitopes identified as low immunodominant (A02Penton<sub>ILHT</sub>, B08Hexon<sub>DLQD</sub>, B08Penton<sub>DSKG</sub>, and B08Penton<sub>DSKK</sub>; Table 1A) were characterized by multicolor flow cytometry in relation to (A) proliferative capacity of peptide-specific T-cell populations, (B) CD8<sup>+</sup> T-cell phenotype, and (C) cytotoxicity of CD3<sup>+</sup>CD8<sup>+</sup> T

cells. **(D)** Cytotoxic potential of CD3<sup>+</sup>CD8<sup>+</sup> T cells in response to the investigated peptides (low-immunodominant: A02Penton<sub>ILHT</sub>, B08Hexon<sub>DLQD</sub>, B08Penton<sub>DSKG</sub>, B08Penton<sub>DSKK</sub> and high-immunodominant: A02Hexon<sub>TLLY</sub>, A01Penton<sub>STDV</sub>) was assessed by using the CD107a degranulation assay. **(A)** Carboxyfluorescein succinimidyl ester (CFSE)-labeled PBMCs from healthy donors were stimulated for seven days with the investigated peptides and analyzed for the frequency of viable proliferative CD3<sup>+</sup> and CD3<sup>+</sup>CD8<sup>+</sup> T cells (CFSE low). Unstimulated CFSE-labeled PBMCs served as negative controls. Results are expressed as mean  $\pm$  SD (n=2). **(B)** Frequency of naïve (T<sub>N</sub>), central memory (T<sub>CM</sub>), effector memory (T<sub>EM</sub>), and terminally differentiated effector memory (T<sub>EMRA</sub>) CD8<sup>+</sup> T-cell subsets before (day 0) and after two restimulation cycles (day 14). Results are expressed as the mean of two independent experiments  $\pm$  SD. **(C)** The cytotoxic activity of HAdV peptide-specific T cells (effector cells, E, day 14) was analyzed in five-hour cytotoxicity assays. Effector T cells were co-cultured with autologous PBMCs as target cells at E:T ratios of 10:1, 30:10, and 60:1, respectively. The basal cytotoxic activity of effector T cells induced by HAdV peptides against the unloaded target cells was subtracted from the cytotoxic T-cell values against peptide-loaded PBMCs. Results of two independent experiments are expressed as the mean percentage of target cell lysis  $\pm$  SD. **(D)** The cytotoxic activity of HAdV-specific T cells induced by the identified immunodominant peptides (day 14) was verified by CD107a degranulation assay. CD107a expression data are shown for a representative donor (SD, standard deviation).
