# Supplementary material for: Discovery of immunodominant T-cell epitopes reveals penton protein as a second immunodominant target in human adenovirus infection
Source: Springer Nature journal article supplement (doi:10.1186/s12967-016-1042-2), 2016-10-07
Supplement: MOESM3 [file 10832052]

**Figure S3. Enrichment of functional A02Hexon<sub>TLLY</sub> and A01Penton<sub>STDV</sub>- specific T cells by IFN- $\gamma$ -based cytokine secretion assay.**

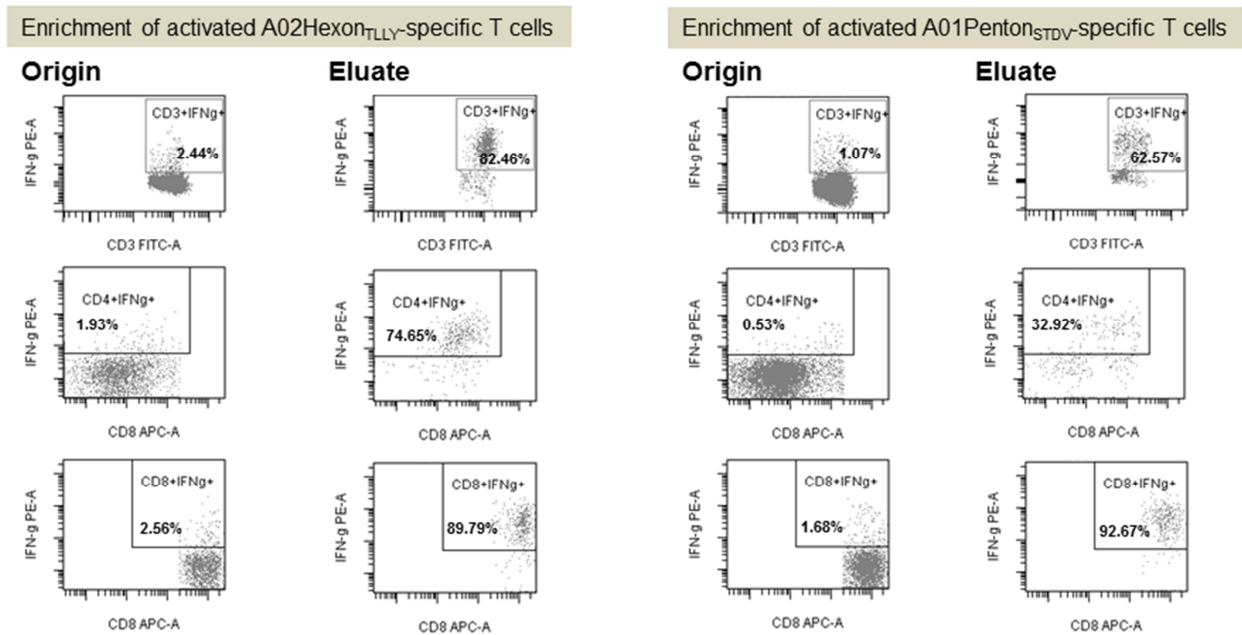

Functional peptide-specific T cells induced by stimulating PBMCs from healthy donors with the peptide candidates A02Hexon<sub>TLLY</sub> or A01Penton<sub>STDV</sub>, respectively were isolated using the IFN- $\gamma$ -based cytokine secretion assay (CSA). The frequency of IFN- $\gamma$ -secreting cells among CD3<sup>+</sup>, CD3<sup>+</sup>CD4<sup>+</sup> and CD3<sup>+</sup>CD8<sup>+</sup> T cells in the CSA fractions before (“Origin”) and after enrichment (“Eluate”) were determined by multicolor flow cytometry. Representative dot plots for one strong responder to A02Hexon<sub>TLLY</sub> and A01Penton<sub>STDV</sub>, respectively, show the results of qualitative analysis of IFN- $\gamma$ -secreting HAdV-specific T cells [%]. The percentages of CD3<sup>+</sup>IFN- $\gamma$ <sup>+</sup> responses were defined in viable CD3<sup>+</sup> T cells, and the percentages of CD4<sup>+</sup>IFN- $\gamma$ <sup>+</sup> and CD8<sup>+</sup>IFN- $\gamma$ <sup>+</sup> responses were defined in viable CD4<sup>+</sup> and CD8<sup>+</sup> T cells, respectively.
